# Supplementary material
Source: MDPI journal article supplement (https://www.mdpi.com/2077-1312/9/6/677)
Supplement: s1 [file s1]

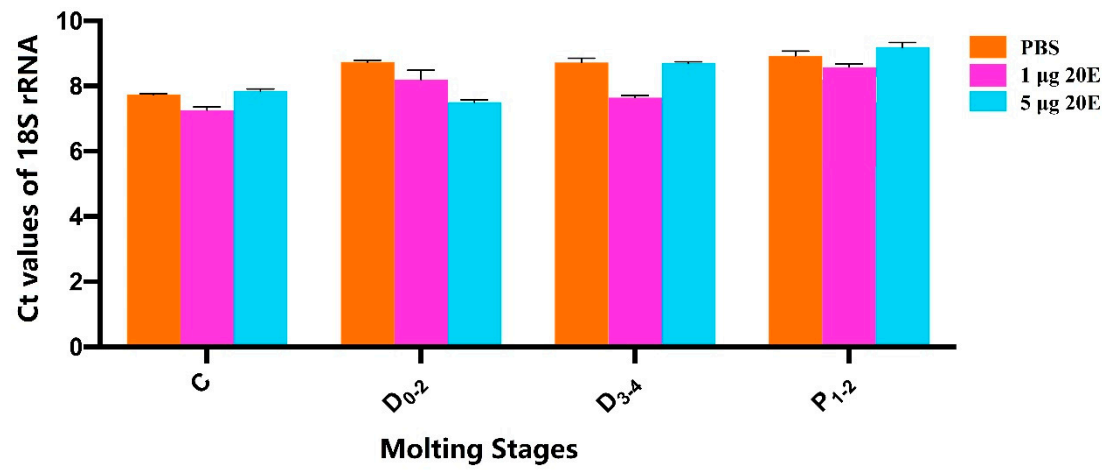

**Figure S1** Expression levels (Ct values ) of the internal gene 18S rRNA in all groups after 20E injection. Data represent means and standard deviations.

Table S1 Differentially expressed genes identified from the transcriptome analysis

| Gene ID     | Symbol    | Description                                                              | Log2(fold change<br>ESA/control) |
|-------------|-----------|--------------------------------------------------------------------------|----------------------------------|
| MSTRG.32535 | Lv-IAG    | insulin-like androgenic gland hormone precursor, partial                 | 2.41                             |
| ROT75912.1  | Gtpbp2    | GTP-binding protein 2-like                                               | 2.47                             |
| ROT83784.1  | calu      | Calumenin                                                                | 2.76                             |
| ROT65965.1  | meng      | serine/threonine-protein kinase DDB_G0277165, partial                    | 3.1                              |
| ROT62953.1  | Serp1b1b  | serine proteinase inhibitor                                              | 2.63                             |
| ROT71033.1  | --        | leucine-rich repeat-containing protein 20-like                           | 2.75                             |
| ROT77030.1  | --        | ankyrin-3-like isoform X1                                                | 2.54                             |
| ROT68844.1  | HSPA8     | heat shock protein 70                                                    | 2.17                             |
| ROT63757.1  | eIF2alpha | eukaryotic initiation factor 2 subunit alpha                             | 3.39                             |
| ROT69739.1  | --        | proton-coupled folate transporter-like                                   | 3.2                              |
| ROT84621.1  | PyK       | pyruvate kinase 3                                                        | 1.87                             |
| ROT79018.1  | --        | fibrillin-2-like                                                         | 1.96                             |
| ROT81133.1  | cpg-2     | filaggrin-2-like isoform X3                                              | -3.09                            |
| MSTRG.4961  | Bre1      | E3 ubiquitin-protein ligase Bre1                                         | 1.8                              |
| MSTRG.2624  | --        | cilia- and flagella-associated protein 251-like                          | -2.47                            |
| ROT82626.1  | --        | mucin-19-like isoform X2                                                 | -3.23                            |
| ROT82192.1  | --        | major facilitator superfamily domain-containing protein 12-like          | 2.06                             |
| ROT62108.1  | Act57B    | actin 1                                                                  | 3.05                             |
| ROT82257.1  | GGCX      | Vitamin K-dependent gamma-carboxylase                                    | -3.1                             |
| ROT75911.1  | Gtpbp2    | GTP-binding protein 2                                                    | -2.23                            |
| MSTRG.964   | --        | C-type lectin LmsL-like                                                  | 1.02                             |
| ROT78659.1  | Yars      | tyrosine--tRNA ligase, cytoplasmic-like                                  | 1.94                             |
| ROT79619.1  | mcm2      | DNA replication licensing factor mcm2-like                               | 1.59                             |
| MSTRG.33021 | yin       | solute carrier family 15 member 2-like isoform X4                        | 4.88                             |
| ROT75925.1  | SERP1B1   | <i>serine proteinase inhibitor-3</i>                                     | -3.3                             |
| ROT62528.1  | --        | <i>agglutinin-like protein ARB_02240 isoform X2</i>                      | 1.41                             |
| ROT76137.1  | HSP90AA1  | <i>heat shock protein 90</i>                                             | 2.25                             |
| ROT76115.1  | ATIC      | <i>bifunctional purine biosynthesis protein PURH</i>                     | 3.65                             |
| ROT82234.1  | Hr4       | <i>hormone receptor 4 isoform X2</i>                                     | -2.06                            |
| ROT70313.1  | NAAT1     | <i>sodium-dependent nutrient amino acid transporter 1-like</i>           | -3.39                            |
| ROT73017.1  | --        | <i>low-density lipoprotein receptor-related protein 2-like</i>           | 3.9                              |
| MSTRG.38881 | rsp-7     | <i>splicing regulatory glutamine/lysine-rich protein 1-like, partial</i> | 1.75                             |
| ROT66295.1  | Tob1      | <i>protein Tob1-like</i>                                                 | 2.36                             |
| ROT78373.1  | --        | <i>male reproductive-related protein A</i>                               | -3.61                            |
| ROT70946.1  | Mi-2      | <i>chromodomain-helicase-DNA-binding protein Mi-2 homolog isoform X4</i> | -1.95                            |
| ROT85933.1  | --        | <i>FK506-binding protein 4-like</i>                                      | 1.3                              |
| ROT64216.1  | Slc15a2   | <i>solute carrier family 15 member 2-like isoform X3</i>                 | 6.43                             |

|             |                 |                                                               |       |
|-------------|-----------------|---------------------------------------------------------------|-------|
| ROT69712.1  | --              | <i>leucine aminopeptidase MCYG_03459-like</i>                 | 3.29  |
| ROT77107.1  | ANPEP           | <i>aminopeptidase N-like</i>                                  | -2.63 |
| ROT67365.1  | --              | <i>SE-cephalotoxin</i>                                        | 1.75  |
| ROT66805.1  | <i>ade5</i>     | <i>multifunctional protein ADE2</i>                           | 3.01  |
| ROT62469.1  | HSP90B1         | <i>endoplasmin</i>                                            | 4.25  |
| ROT74957.1  | <i>cdc45</i>    | <i>cell division control protein 45 homolog</i>               | -1.81 |
| ROT75353.1  | <i>Plbd1</i>    | <i>Phospholipase B lamina ancestor</i>                        | 1.41  |
| ROT84712.1  | <i>TpnC41C</i>  | <i>troponin C</i>                                             | 1.78  |
| MSTRG.5401  | --              | <i>SWD4</i>                                                   | -1.76 |
| ROT75925.1  | SERPINB1        | <i>serine proteinase inhibitor-3</i>                          | -3.3  |
| ROT66638.1  | <i>Prpf19</i>   | <i>pre-mRNA-processing factor 19-like</i>                     | 1.93  |
| ROT85080.1  | KCNK17          | <i>potassium channel subfamily K member 10-like</i>           | 2     |
| ROT69384.1  | <i>Skeletor</i> | <i>protein Skeletor, isoforms B/C isoform X3</i>              | 3.5   |
| MSTRG.2017  | --              | <i>asialoglycoprotein receptor 2-like, partial</i>            | 4.25  |
| ROT82204.1  | GRWD1           | <i>glutamate-rich WD repeat-containing protein 1</i>          | 3.25  |
| ROT72181.1  | <i>Iswi</i>     | <i>chromatin-remodeling complex ATPase chain Iswi</i>         | 4.03  |
| ROT76311.1  | --              | <i>mucin-19-like isoform X1</i>                               | 3.8   |
| MSTRG.34400 | CHD4            | <i>chromodomain-helicase-DNA-binding protein Mi-2 homolog</i> | -2.94 |
| MSTRG.11644 | --              | <i>male reproductive-related protein A</i>                    | -4.12 |
| ROT73814.1  | <i>Nup133</i>   | <i>nuclear pore complex protein Nup133-like</i>               | -2.76 |
| ROT85474.1  | <i>ade5</i>     | <i>multifunctional protein ADE2</i>                           | -3.48 |
| ROT64438.1  | <i>Pa2g4</i>    | <i>proliferation-associated protein 2G4 isoform X2</i>        | -7.98 |
| ROT73693.1  | --              | -                                                             | 1.1   |
| MSTRG.20484 | --              | -                                                             | -1.75 |
| MSTRG.12394 | --              | <i>uncharacterized protein LOC113803799</i>                   | -6.43 |
| MSTRG.8889  | --              | -                                                             | 2.35  |
| MSTRG.21195 | --              | -                                                             | 1.22  |
| MSTRG.14155 | --              | -                                                             | 2.36  |
| MSTRG.15340 | --              | -                                                             | 3.65  |
| MSTRG.37456 | --              | -                                                             | -4.26 |

---
